# Supplementary material for: Evaluating an Earth system model from a water manager perspective
Source: Copernicus journal article supplement (doi:10.5194/hess-29-1117-2025), 2025-02-28
Supplement: Supplementary file 1 [file hess-29-1117-2025-supplement.pdf]

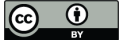

*Supplement of*

## **Evaluating an Earth system model from a water manager perspective**

**Mari R. Tye et al.**

*Correspondence to:* Mari R. Tye ([maritye@ucar.edu](mailto:maritye@ucar.edu))

The copyright of individual parts of the supplement might differ from the article licence.

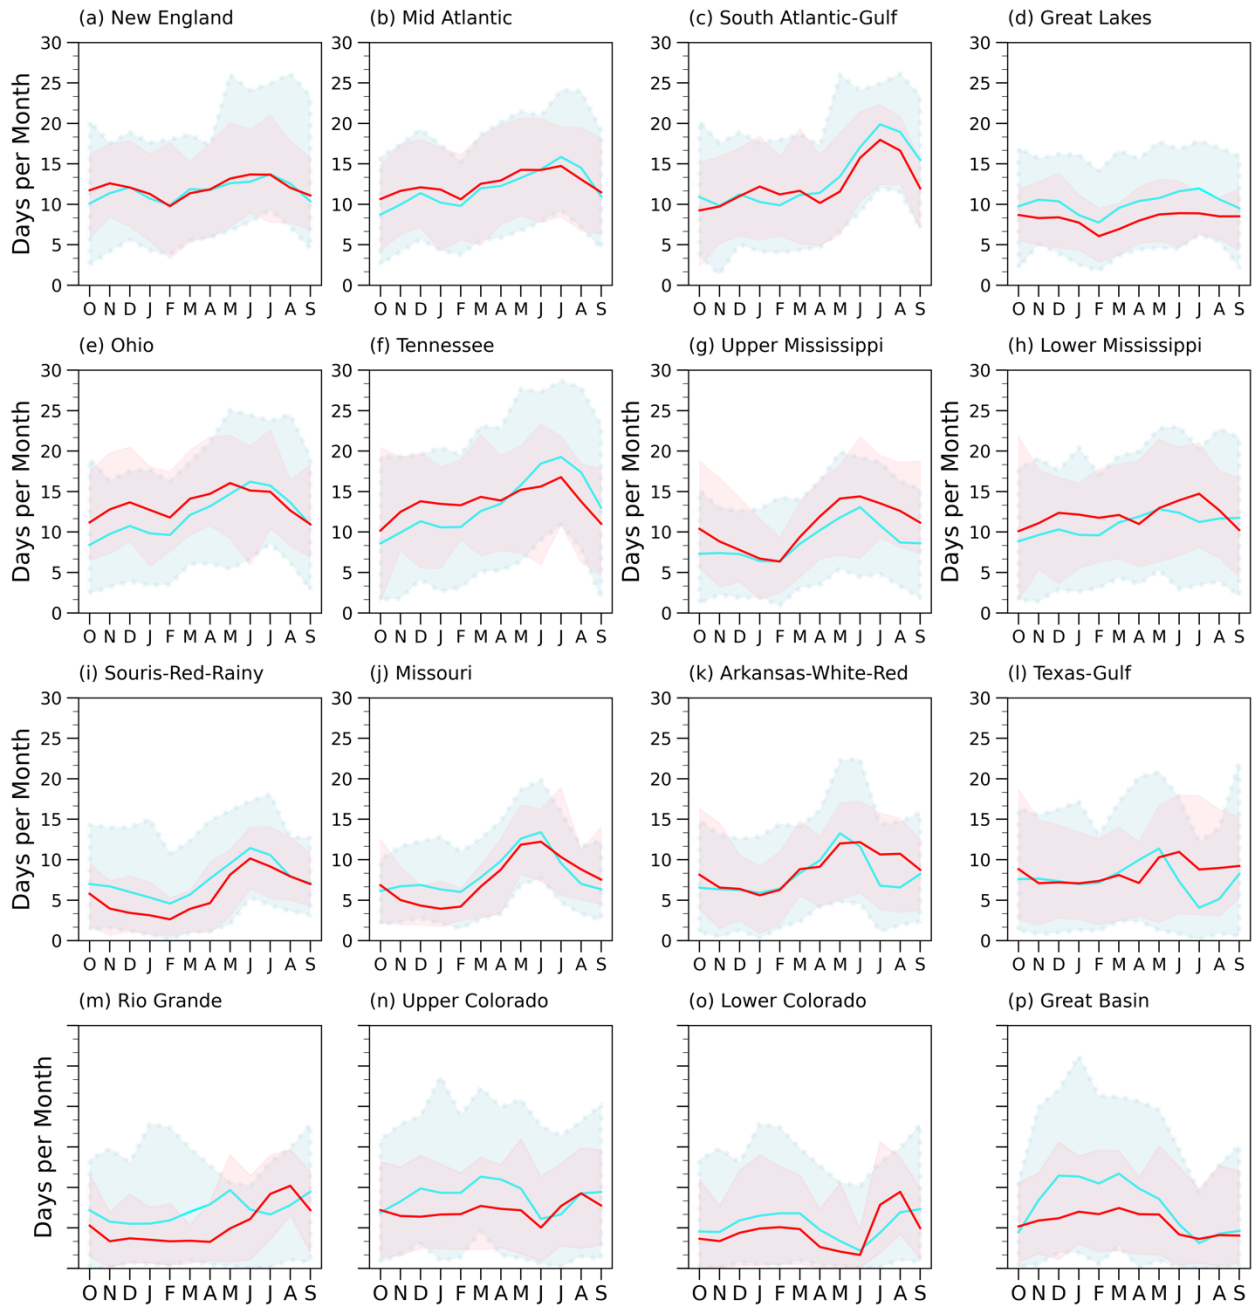

**Figure S1: Average number of wet days per month for Livneh climatological mean (red) with interannual spread (pink) and CESM2 mean (cyan) with interannual and ensemble spread (light blue) in all regions not included in main text.**

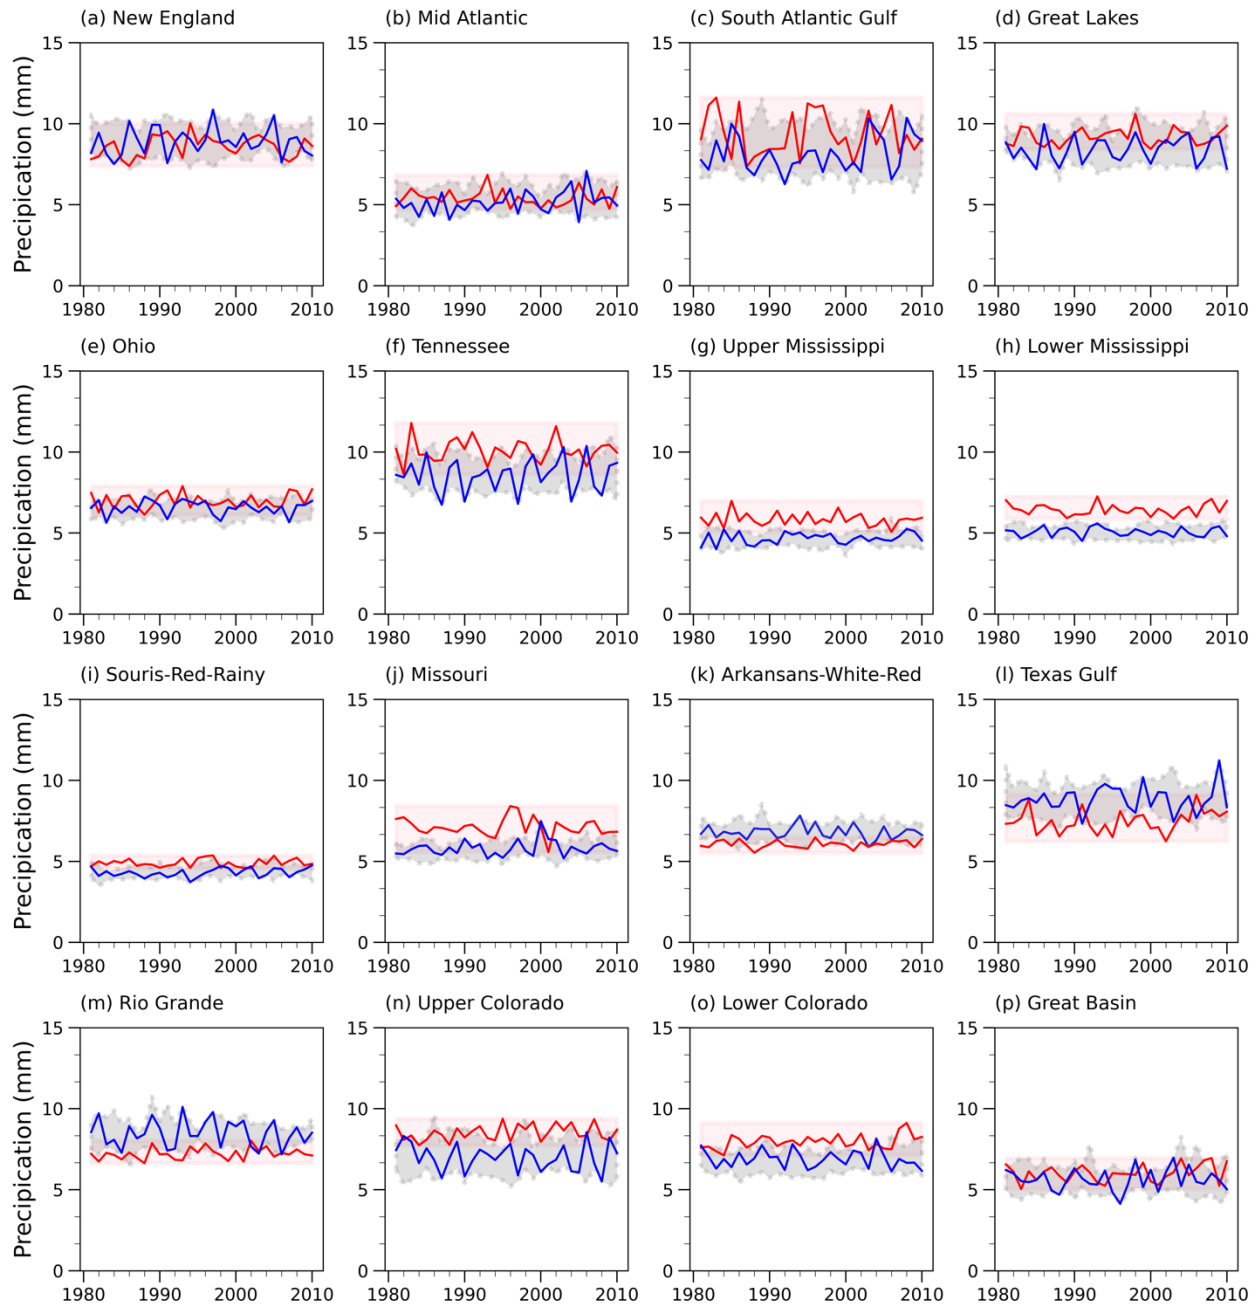

**Figure S2: Interannual variability in mean annual precipitation on wet days for Livneh climatological mean (red) with interannual spread (pink) and CESM2 mean (cyan) with interannual and ensemble spread (light blue) for all regions not included in main text.**

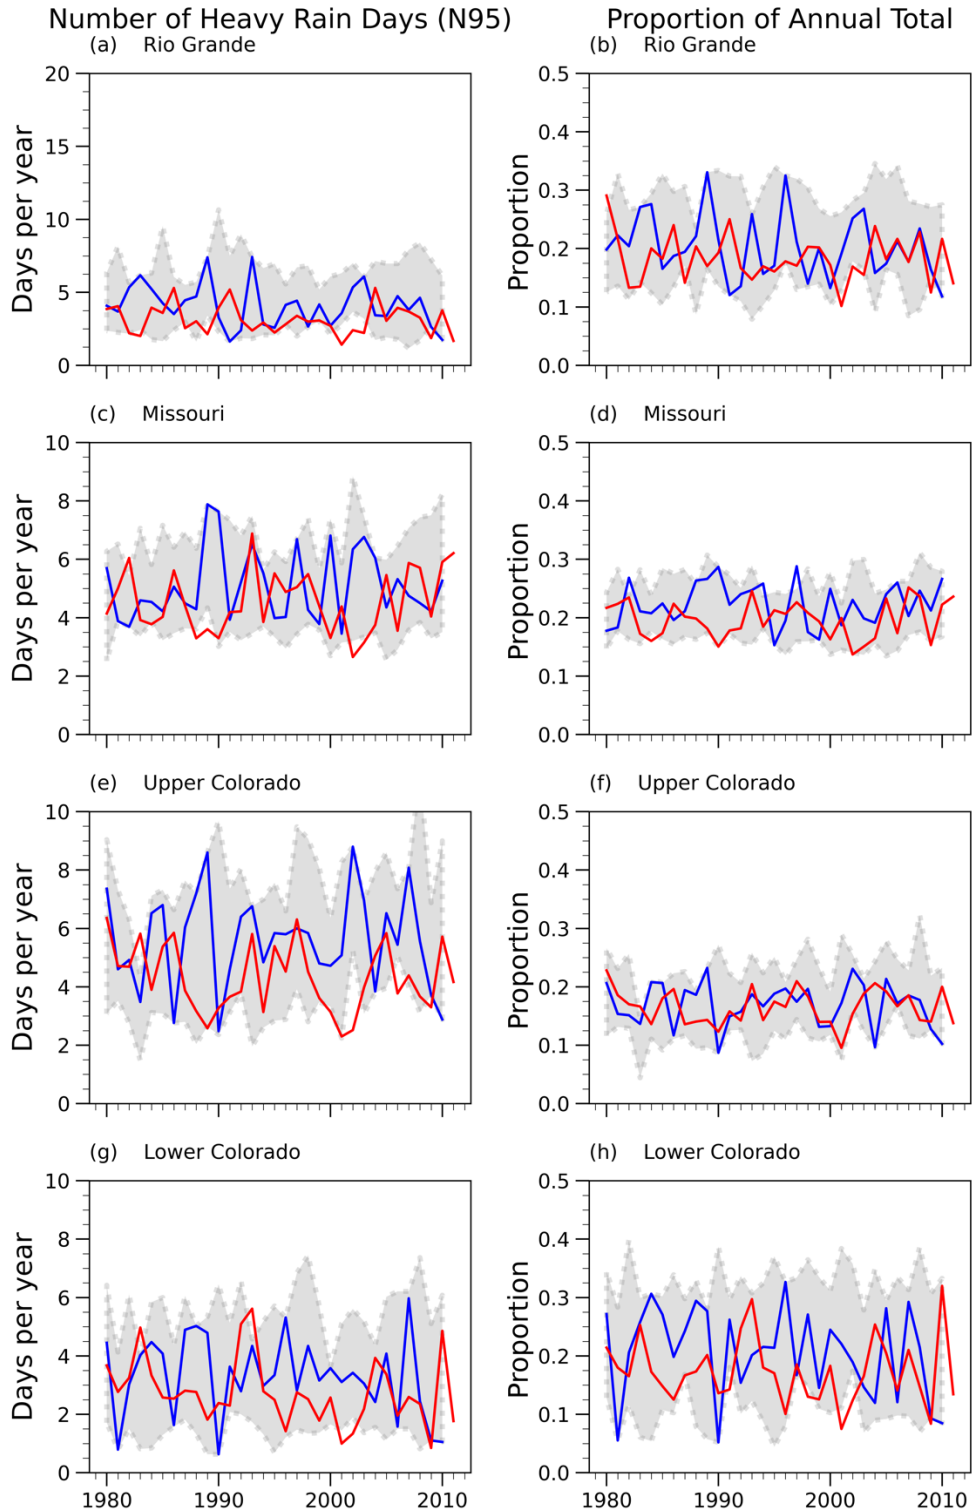

**Figure S3: a, c, e, g) Number of very heavy rain days per year; and b, d, f, h) total rain from very heavy rain days as a proportion of the annual total for a, b) Rio Grande (RIO); c, d) Missouri (MR); e, f) Upper Colorado (LCO); and g, h) Lower Colorado (UC) HUC2 regions. Observations in red; CSM2 ensemble spread in gray, single randomly selected ensemble member in blue.**

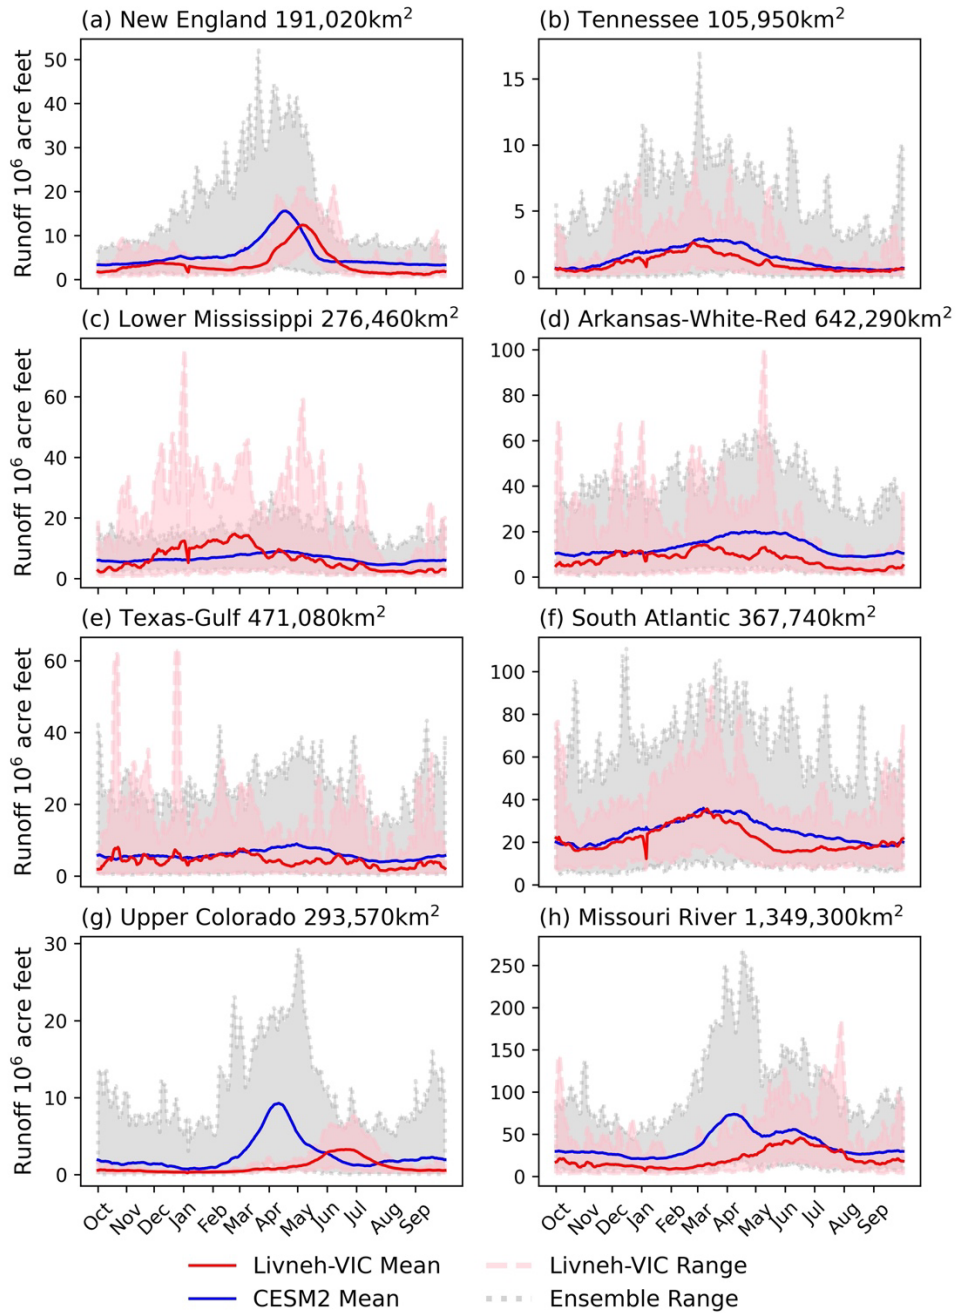

**Figure S4: Interannual variability in runoff for the mean seasonal cycle for regions New England (NE1), Tennessee (TN6), Lower Mississippi (LM8), Arkansas-White-Red (ARK11), Texas-Gulf (GUL12), South Atlantic (SA3), Upper Colorado (UC14) and Missouri Regions (MR10). Livneh-VIC climatological mean in red, range of all years in pink; CESM2 ensemble mean in blue and ensemble range in gray.**

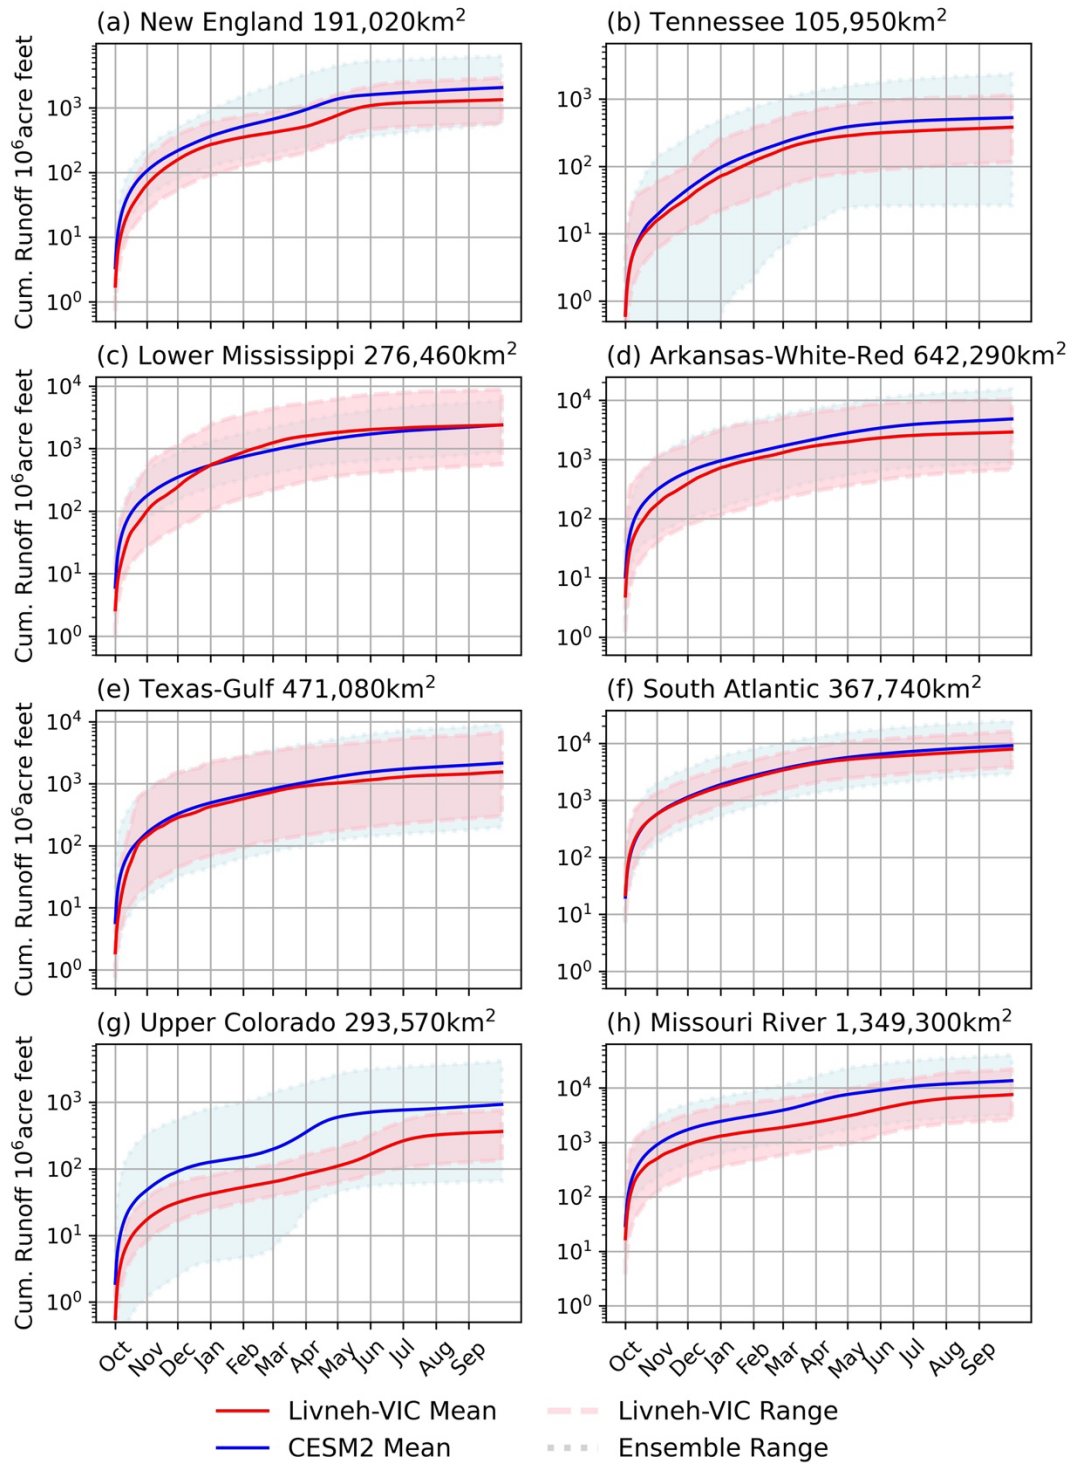

**Figure S5: Interannual variability in runoff for the cumulative watershed runoff over the water year. Details as for S4.**
